# Supplementary material for: Effect of anti-IL17 and/or Rho-kinase inhibitor treatments on vascular remodeling induced by chronic allergic pulmonary inflammation
Source: PubMed Central journal article supplement — Ther Adv Respir Dis. 2020 Dec 23;14:1753466620962665. doi: 10.1177/1753466620962665 (PMC7768836; doi:10.1177/1753466620962665), 2020-12-23
Supplement: sj-pdf-2-tar-10.1177_1753466620962665.pdf [file sj-pdf-2-tar-10.1177_1753466620962665.pdf]

Reviewer 1

Comments to the Author

In this manuscript, Santos et al utilize ovalbumin-induced chronic allergic lung inflammation murine model to assess the effects of anti-IL17 and/or Rho-kinase inhibitor treatments on vascular remodeling induced by chronic allergic lung inflammation. This is an interesting paper and builds on their recent work indicating the treatments modulate airway hyperresponsiveness, inflammation, tissue remodeling, and oxidative stress in chronic allergic lung inflammation murine model. Strengths of the manuscript include it is a well-designed study, particularly with its use of murine experiments with therapeutic relevance. I have several comments which I believe if addressed could strengthen the manuscript.

1. Was there any smooth muscle thickening? Appearance of perivascular myofibroblasts? If yes, the treatments had any effect on these features?

2. In the title, "in a chronic allergic pulmonary inflammation" should be rephrased to "induced by chronic allergic pulmonary inflammation"

3. Fig 1 Figure legends should be rewritten. Each figure should stand alone with concise clear message; the caption should be stated something like as "Anti-IL-17 or Rho-kinase inhibitor has no effect on angiogenesis in ovalbumin-induced chronic lung inflammation in mice". After caption, briefly describe the model and treatments in one or two sentences, number of mice/groups? which stats methods were used? data are shown as mean  $\pm$  standard error mean? ROHi, Ova abbreviation?

4. Fig 2 Figure legends should be re-written. See above comment. ROHi, Ova abbreviation?

5. Fig 3 Figure legends should be re-written. See above comment. Which staining? Representative image for how many mice? ROHi, Ova abbreviation?

6. Figures 2 and 3 should be combined

7. Fig 4 Figure legends should be re-written. See above comment.

8. Fig 5 Figure legends should be re-written. See above comment. Which staining? Representative image for how many mice? ROHi, Ova abbreviation?

9. Figure 4 and 5 should be combined

10. Fig 6 Figure legends should be re-written. See above comment.

11. Fig 7 Figure legends should be re-written. See above comment. Which staining? Representative image for how many mice?

12. Figures 6 and 7 should be combined

13. Fig 8 Figure legends should be re-written. See above comment.

14. Fig 9 Figure legends should be rewritten. See above comment. Which staining? Representative image for how many mice?

15. Figures 8 and 9 should be combined

16. Fig 10 Figure legends should be re-written. See above comment.

17. In Table 1, treatments doses? duration?
18. Page 19, lines 47-56, please include reference
19. Page 20, lines 45-51, please include reference
20. Page 21 Line 26-31 objective should be removed.
21. Page 21 Line 47 Please include age of the mice
22. Page 23 Line 22-23 please reworded "in the sequence described by"
23. Page 25-line 6 standard error mean?
24. Page 25 line 25 Please re-write title of the result section. E,g anti-IL17 and/or Rho-kinase inhibitor treatments has no effect on angiogenesis in Ova-induced experimental asthma
25. Page 25 Please re-write title of the result section. The title should be informative, and reflect the results
26. Page 26 line 5 and 31 Please re-write title of the result sections as suggested above
27. Page 27 lines 3, 22, 42 Please re-write title of the result sections as suggested above
28. Page 28 line 5 please completely re-write the first paragraph of the discussion. Please briefly describe background, then mention knowledge gap, how did you addressed, what you found, importance of the findings in couple of sentences in the first paragraph of discussion. Next discuss one by one the findings.....
29. Page 30-line 3 asthma models?
